# Supplementary material
Source: PubMed Central journal article supplement (PMC5441936)
Supplement: NIHMS837885-supplement-10577_2016_9541_MOESM1_ESM.pdf [file NIHMS837885-supplement-10577_2016_9541_MOESM1_ESM.pdf]

CLAMP 1 MEDLTKNII FTNAINGQPATIQYQTADGTILKQPKIEGQKTEQQPTFYTTNGNGGTVNL  
clamp1 1 MEDLTKNII FTNAINGQPATIQYQTADGTILKQPKIEGQKTEQQPTFYTTNGNGGTVNL  
clamp2 1 MEDLTKNII FTNAINGQPATIQYQTADGTILKQPKIEGQKTEQQPTFYTTNGNGGTVNL

CLAMP 61 AQLATTTDDNKTCYIAQPVGGYNYALVNGMPLNQGAALGIATVDAQGRIQIVNQNKPIAAN  
clamp1 61 AQLATTTDDNKTCYIAQPVGGYNYALVNGMPLNQGAALGIATVDAQGRIQIVNQNKPIAAN  
clamp2 61 AQLATTTDDNKTCYIAQPVGGYNYALVNGMPLNQGAALGIATVDAQGRIQIVNQNKPIAAN

CLAMP 121 TISNISFKCDVCSDMFPHLALLNAHKRMHTDGEQQQQQHNAAQAGGDSIAVVSAQGLVQA  
clamp1 121 TISNISFKCDVCSDMFPHLALLNAHKRMHTDGEQQQQQHNAAQAGGDSIAVVSAQGLVQA  
clamp2 121 TISNISFKCDVCSDMFPHLALLNAHKRMHTDGEQQQQQHNAAQAGGDSIAVVSAQGLVQA

CLAMP 181 QNIIGNGMGQIQIVSSDTLEPVQQSVMQQQQHESKASKCINCGSSMLQQSKRKGPKQVR  
clamp1 181 QNIIGNGMGQIQIVSSDTLEPVQQSVMQQQQHESKASKCINCGSSMLQQSKRKGPKQVR  
clamp2 181 QNIIGNGMGQIQIVSSDTLEPVQQSVMQQQQHESKASKCINCGSSMLQQSKRKGPKQVR

CLAMP 241 CESCMAEQTAQQQQQLFVAQDGMHPVQIIISTTPQAQAQLQQIVAAQTGGTTPKREAS  
clamp1 241 CESCMAEQTAQQQQQLFVAQDGMHPVQIIISTTPQAQAQLQQIVAAQTGGTTPKREAS  
clamp2 241 CESCMAEQTAQQQQQLFVAQDGMHPVQIIISTTPQAQAQLQQIVAAQTGGTTPKREAS

CLAMP 301 SGSGHHPVKKRNSQQMTKCQKCNVSGVVLVQSHASHSGVGGSVKQSVTVKTECLSCRN  
clamp1 301 SGSGHHPVKKRNSQQMTKCQKCNVSGVV--GQSHASHSGVGGSVKQSVTVKTECLSCRN  
clamp2 301 SGSGHHPVKKRNSQQMTKCQKCNVSGVV--G**STPMLHTAGWADR**-----

Zinc Finger 1

Zinc Finger 2

CLAMP 361 PSKPFSCNICGGLFSRYSSLWSHKKLHSGEKYKCSICGLAFAKAVYLKNHARIHTGEKP  
clamp1 359 PSKPFSCNICGGLFSRYSSLWSHKKLHSGEKYKCSICGLAFAKAVYLKNHARIHTGEKP  
clamp2 -----

Zinc Finger 3

Zinc Finger 4

CLAMP 421 YKCQTCGMQFSQSPHLKNHERTHSGERPVCVCDKGFARHATLWNHRRRIHTGEKPYKCE  
clamp1 419 YKCQTCGMQFSQSPHLKNHERTHSGERPVCVCDKGFARHATLWNHRRRIHTGEKPYKCE  
clamp2 -----

Zinc Finger 5

Zinc Finger 6

CLAMP 481 ICGSAFSQAHLKNHAKVHSGEKPYKCEICSAAFADRFALKRHRGIHQYGTAPRQTSS  
clamp1 479 ICGSAFSQAHLKNHAKVHSGEKPYKCEICSAAFADRFALKRHRGIHQYGTAPRQTSS  
clamp2 -----

CLAMP 541 DGMIVHKQEIPDMEDEAQQEVIIGGL  
clamp1 539 DGMIVHKQEIPDMEDEAQQEVIIGGL  
clamp2 -----
