# Supplementary material
Source: PubMed Central journal article supplement (PMC5441936)
Supplement: NIHMS837885-supplement-10577_2016_9541_MOESM5_ESM.pdf [file NIHMS837885-supplement-10577_2016_9541_MOESM5_ESM.pdf]

| qRT-PCR primers | Target        | Forward Primer Sequence | Reverse Primer Sequence |
|-----------------|---------------|-------------------------|-------------------------|
|                 | <i>gapdh</i>  | GACGAAATCAAGGCTAAGGTCG  | AATGGGTGTCGCTGAAGAAGTC  |
|                 | <i>ras64b</i> | GATCCCACCATTGAAGACTCG   | AGCTGGAATGATCGTTGAGCG   |
|                 | <i>rpl32</i>  | AGCATAACAGGCCCAAGATCG   | TGTTGTCGATACCCTTGGGC    |
|                 | <i>clamp</i>  | CTGACCACGGCAATAGAA      | TCCCTCATTTGGCACTTC      |
|                 | <i>msl1</i>   | TCAGTTCTGGCGTTTACAT     | GACGAGGACGACGAAGAT      |
|                 | <i>msl2</i>   | GCCCTGTCCGTATGAATG      | CAACATGGGTAAACAACC      |
|                 | <i>msl3</i>   | CACGGGCAGTTTGTAGGC      | CAATGGACAGATCGGAGTTA    |
|                 | <i>mof</i>    | CAAGTATTGGAAGGGCCAGA    | AGACGAGGTAATCGGTGTCG    |
|                 | <i>mle</i>    | TGACAGACTTTGTGCCTTCG    | TAGTTGATTTCCGCCTCGTC    |
|                 | <i>roX1</i>   | ATGCGAGCGAGACAATGATACT  | GACTTGCAGTCCGCCCTATG    |
|                 | <i>roX2</i>   | CGTTACTCTTGCTTGATTTTGC  | AGCTCGGATGGCCATCGAAA    |

**Table S1: Primer sequences of targets tested by qRT-PCR**
