# Supplementary material
Source: PubMed Central journal article supplement (PMC5441936)
Supplement: NIHMS837885-supplement-10577_2016_9541_MOESM6_ESM.pdf [file NIHMS837885-supplement-10577_2016_9541_MOESM6_ESM.pdf]

|        |                   | <i>w</i> ; <i>clamp</i> <sup>1</sup> /<br>CyO-GFP; | <i>w</i> ; <i>clamp</i> <sup>1</sup> /<br><i>clamp</i> <sup>1</sup> ; | <i>w</i> ; <i>clamp</i> <sup>2</sup> /<br>CyO-GFP; | <i>w</i> ; <i>clamp</i> <sup>2</sup> /<br><i>clamp</i> <sup>2</sup> ; |
|--------|-------------------|----------------------------------------------------|-----------------------------------------------------------------------|----------------------------------------------------|-----------------------------------------------------------------------|
| Female | Larvae            | 99                                                 | 10                                                                    | 81                                                 | 8                                                                     |
|        | Adults<br>eclosed | 94 (95%)                                           | 10 (100%)                                                             | 80 (99%)                                           | 0 (0%)                                                                |
| Male   | Larvae            | 98                                                 | 5                                                                     | 100                                                | 1                                                                     |
|        | Adults<br>eclosed | 94 (95%)                                           | 5 (100%)                                                              | 96 (96%)                                           | 0 (0%)                                                                |

**Table S2: *clamp*<sup>1</sup> and *clamp*<sup>2</sup> counts of larvae and adults eclosed**
