# Supplementary material
Source: PubMed Central journal article supplement (PMC5441936)
Supplement: NIHMS837885-supplement-10577_2016_9541_MOESM7_ESM.pdf [file NIHMS837885-supplement-10577_2016_9541_MOESM7_ESM.pdf]

| Sex                   | <i>clamp</i> <sup>l</sup> genotype                                            | Observed<br>( <i>O</i> ) | Expected<br>( <i>E</i> ) | ( <i>O</i> – <i>E</i> ) | ( <i>O</i> – <i>E</i> ) <sup>2</sup> | $\frac{(O - E)^2}{E}$ |
|-----------------------|-------------------------------------------------------------------------------|--------------------------|--------------------------|-------------------------|--------------------------------------|-----------------------|
| Female                | <i>w</i> <sup>-</sup> ; <i>clamp</i> <sup>l</sup> / <i>CyO</i> -GFP           | 99                       | 69.96                    | 29.04                   | 843.32                               | 12.05                 |
|                       | <i>w</i> <sup>-</sup> ; <i>clamp</i> <sup>l</sup> / <i>clamp</i> <sup>l</sup> | 10                       | 34.98                    | -24.98                  | 624.00                               | 17.83                 |
| Male                  | <i>w</i> <sup>-</sup> ; <i>clamp</i> <sup>l</sup> / <i>CyO</i> -GFP           | 98                       | 69.96                    | 28.04                   | 786.24                               | 11.23                 |
|                       | <i>w</i> <sup>-</sup> ; <i>clamp</i> <sup>l</sup> / <i>clamp</i> <sup>l</sup> | 5                        | 34.98                    | -29.98                  | 898.80                               | 25.69                 |
| Chi-squared statistic |                                                                               |                          |                          |                         |                                      | <b>66.82</b>          |

**Table S3: Chi-squared analysis for heterozygous and homozygous *clamp*<sup>l</sup> larvae**
