# Supplementary material
Source: PubMed Central journal article supplement (PMC5441936)
Supplement: NIHMS837885-supplement-10577_2016_9541_MOESM8_ESM.pdf [file NIHMS837885-supplement-10577_2016_9541_MOESM8_ESM.pdf]

| Sex                   | <i>clamp</i> <sup>2</sup> genotype                                            | Observed<br>( <i>O</i> ) | Expected<br>( <i>E</i> ) | ( <i>O</i> - <i>E</i> ) | ( <i>O</i> - <i>E</i> ) <sup>2</sup> | $\frac{(O - E)^2}{E}$ |
|-----------------------|-------------------------------------------------------------------------------|--------------------------|--------------------------|-------------------------|--------------------------------------|-----------------------|
| Female                | <i>w</i> <sup>-</sup> ; <i>clamp</i> <sup>2</sup> /CyO-GFP                    | 81                       | 62.7                     | 18.3                    | 334.89                               | 5.34                  |
|                       | <i>w</i> <sup>-</sup> ; <i>clamp</i> <sup>2</sup> / <i>clamp</i> <sup>2</sup> | 8                        | 31.35                    | -23.35                  | 545.22                               | 17.39                 |
| Male                  | <i>w</i> <sup>-</sup> ; <i>clamp</i> <sup>2</sup> /CyO-GFP                    | 100                      | 62.7                     | 37.3                    | 1391.29                              | 22.19                 |
|                       | <i>w</i> <sup>-</sup> ; <i>clamp</i> <sup>2</sup> / <i>clamp</i> <sup>2</sup> | 1                        | 31.35                    | -30.35                  | 921.12                               | 29.38                 |
| Chi-squared statistic |                                                                               |                          |                          |                         |                                      | <b>74.30</b>          |

**Table S4: Chi-squared analysis for heterozygous and homozygous *clamp*<sup>2</sup> larvae**
