# Supplementary material
Source: PubMed Central journal article supplement (PMC5441936)

## Supplemental Figure 2

**A.**

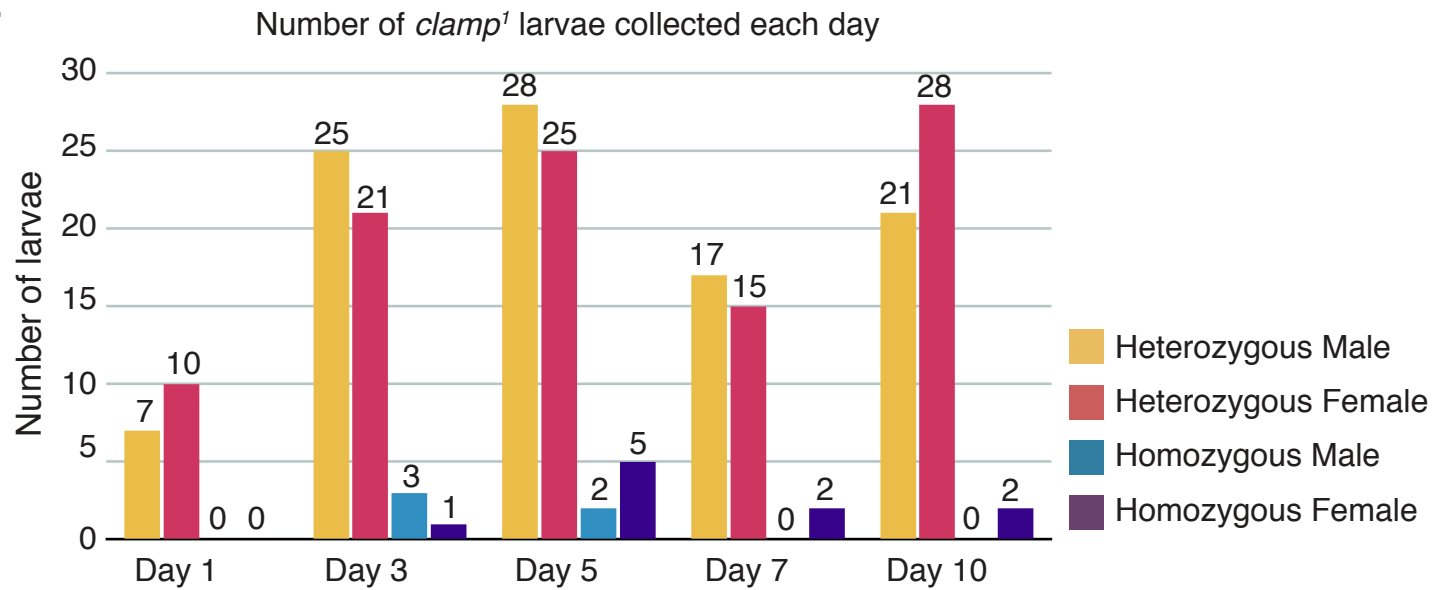

**B.**

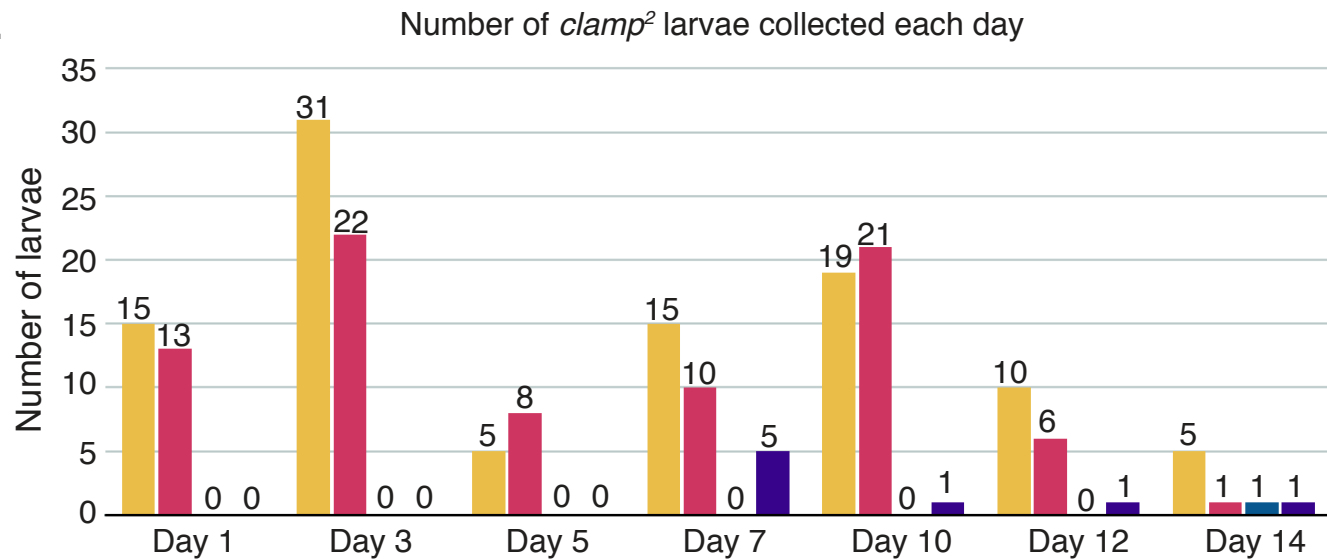

Supplement: NIHMS837885-supplement-10577_2016_9541_MOESM2_ESM.pdf [file NIHMS837885-supplement-10577_2016_9541_MOESM2_ESM.pdf]

### Supplemental Figure 3

#### A. Change in *clamp* transcript abundance

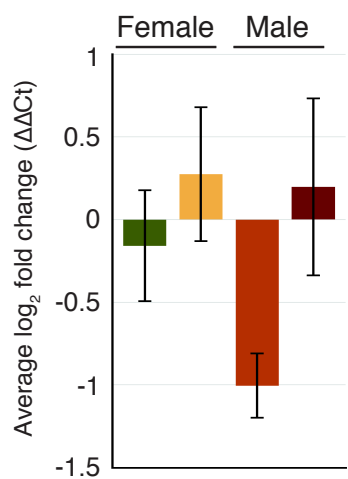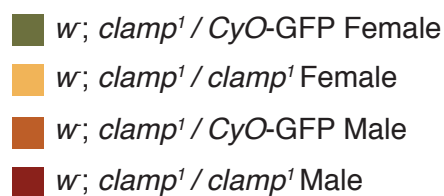

#### B.

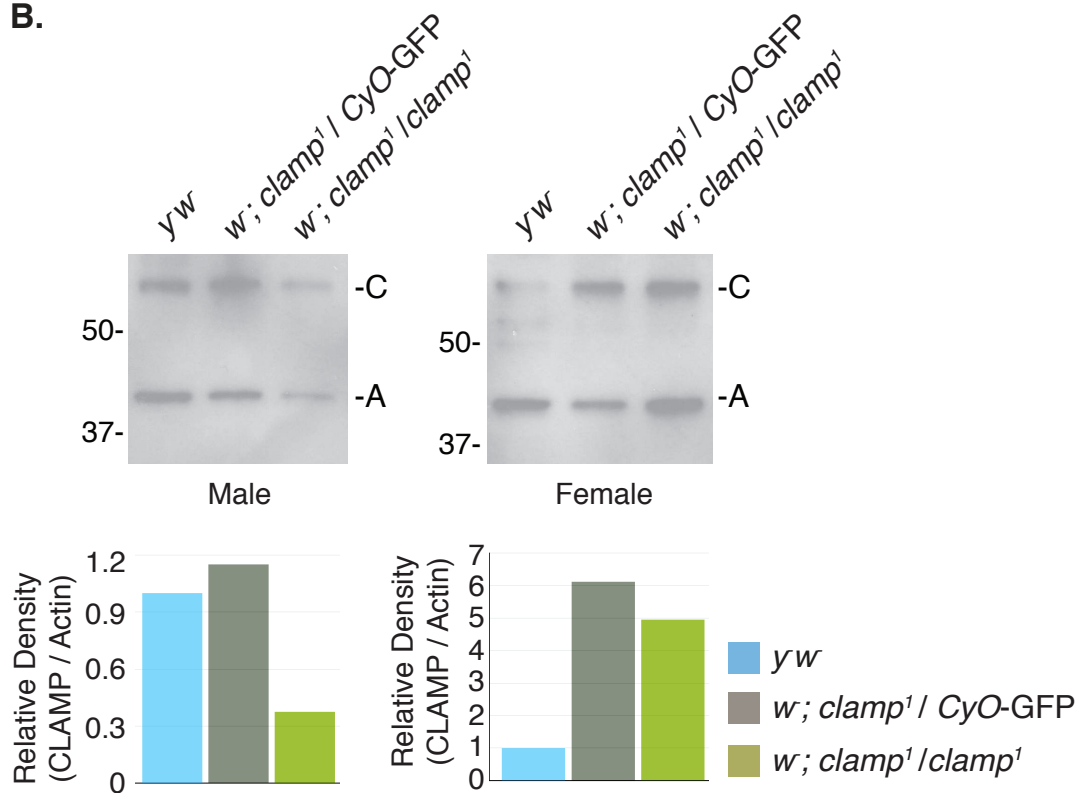

#### C.

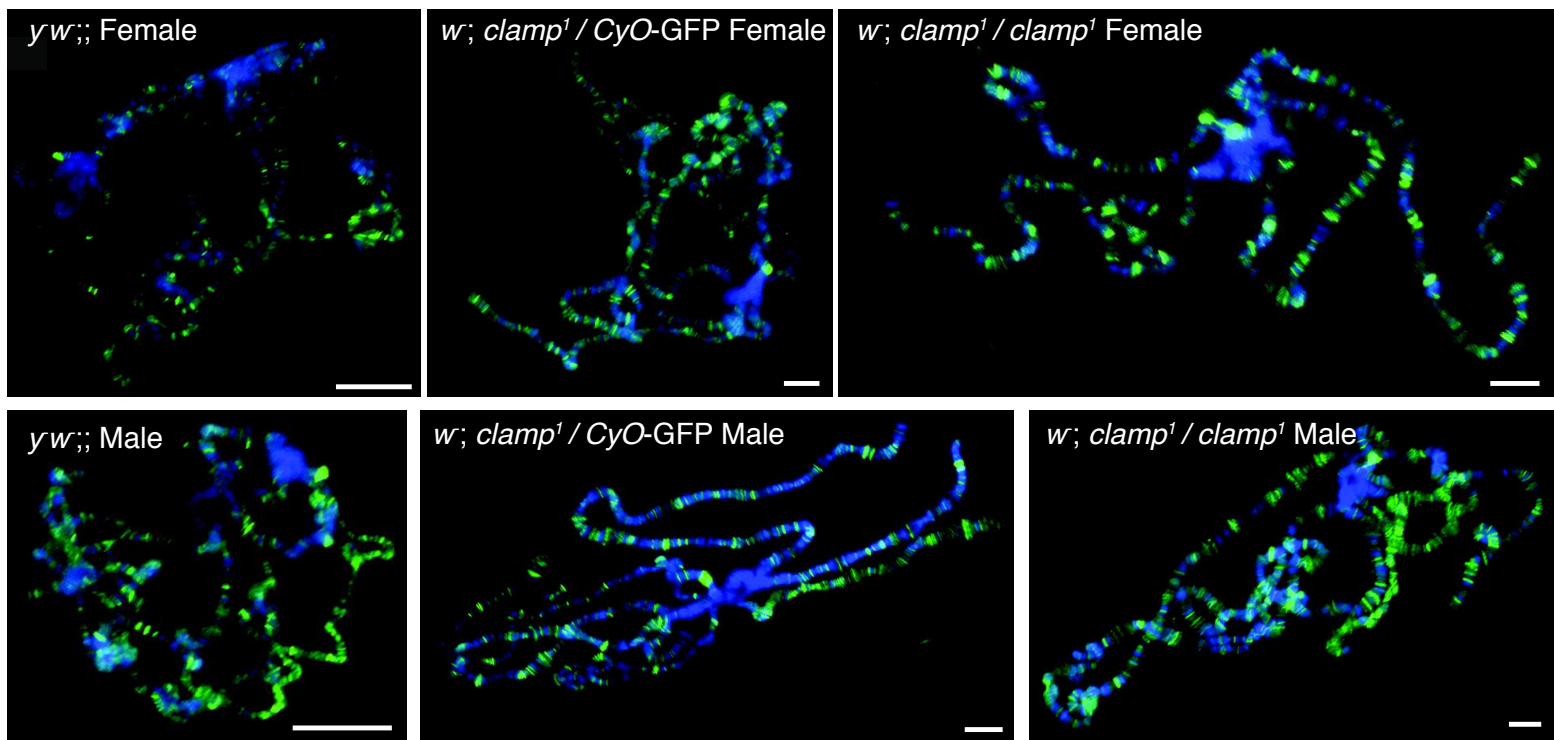

Supplement: NIHMS837885-supplement-10577_2016_9541_MOESM3_ESM.pdf [file NIHMS837885-supplement-10577_2016_9541_MOESM3_ESM.pdf]

**Supplemental Figure 4**

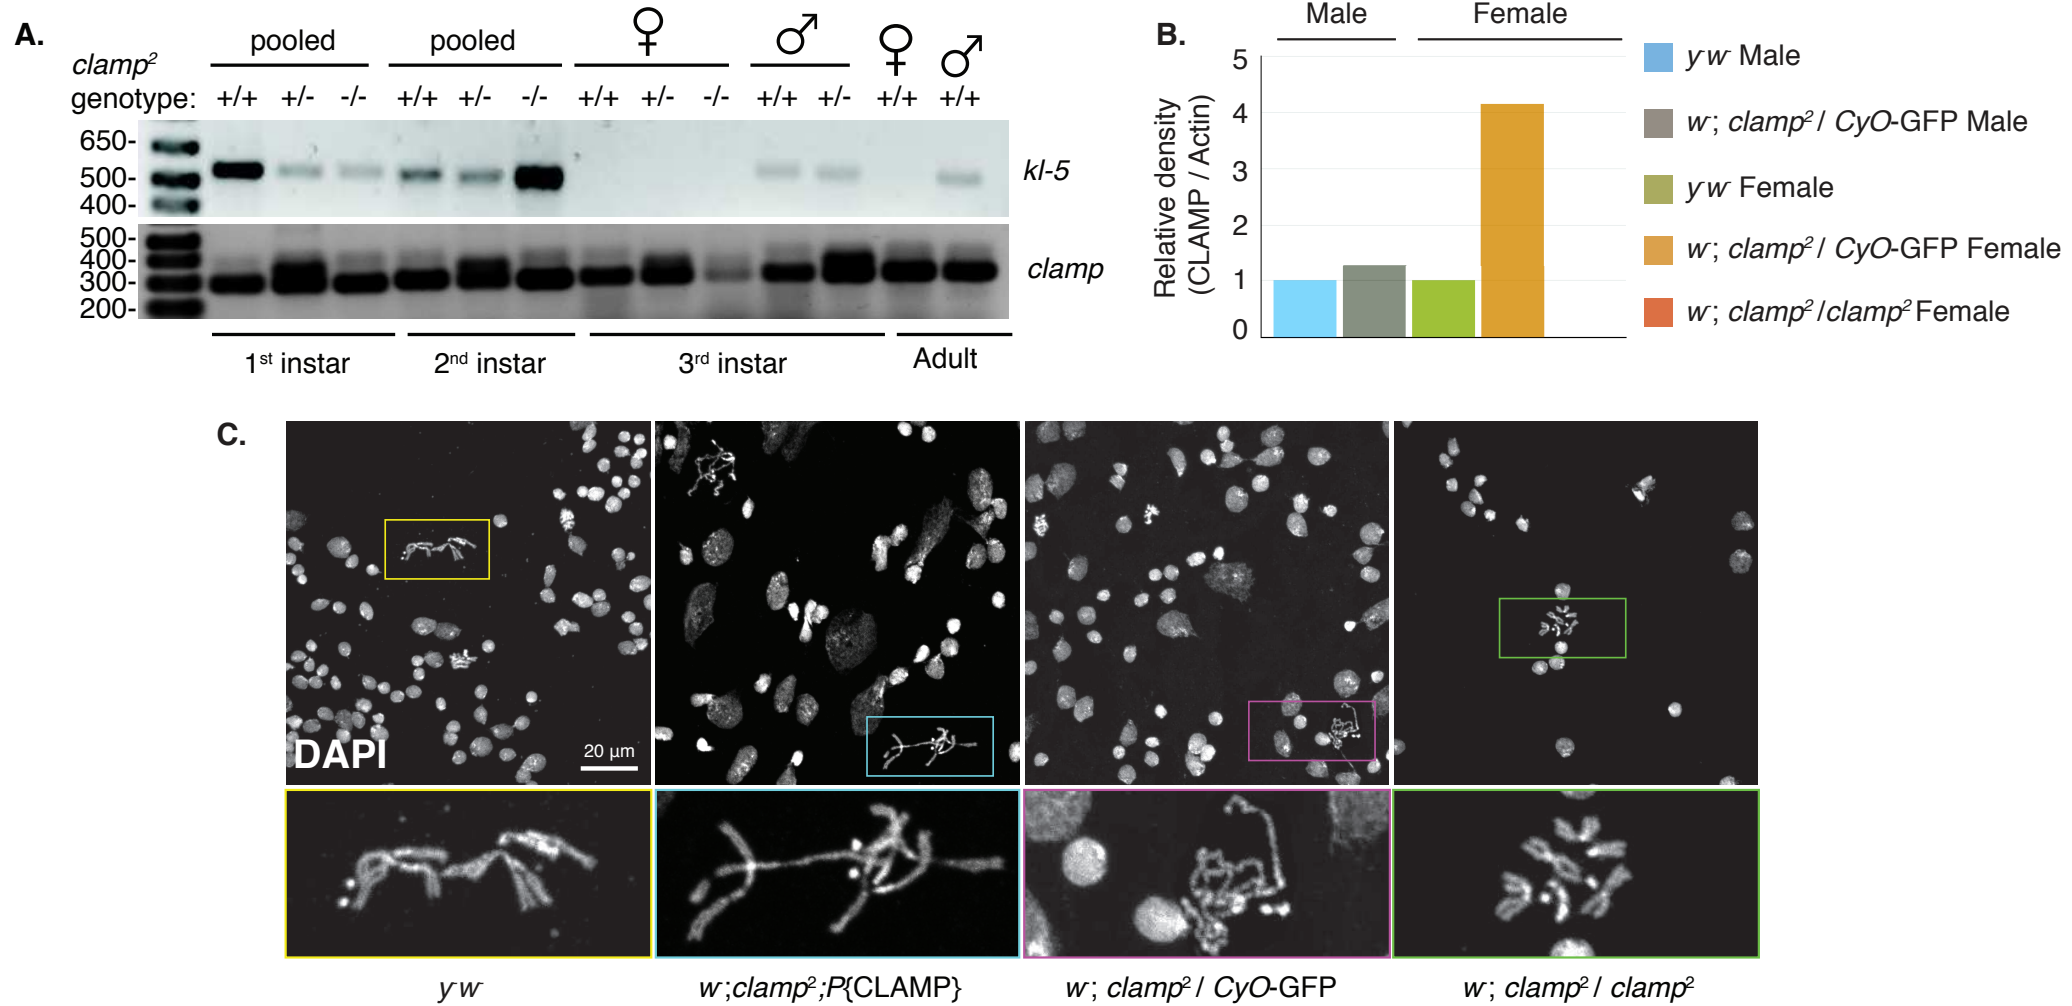

Supplement: NIHMS837885-supplement-10577_2016_9541_MOESM4_ESM.pdf [file NIHMS837885-supplement-10577_2016_9541_MOESM4_ESM.pdf]
